# Supplementary material for: Fusarium diversity associated with diseased cereals in China, with an updated phylogenomic assessment of the genus
Source: PubMed Central journal article supplement — Stud Mycol. 2023 Feb 22;104:87–148. doi: 10.3114/sim.2022.104.02 (PMC10282163; doi:10.3114/sim.2022.104.02), 2023-02-22
Supplement: sim-2023-104-2-SD2.pdf [file sim-2023-104-2-SD2.pdf]

Table S1. Collection details and GenBank accession numbers of 2020 *Fusarium* strains isolated in this study. The 608 representative *Fusarium* strains are in bold.

| Strain <sup>a</sup>   | Species complex <sup>b</sup> | Species name <sup>c</sup> | Location                                                                | Sample ID   | Climate               | Host  | Symptom | Collection date | Collector           | GenBank accession number <sup>d</sup> |    |     |         |         |         |         |
|-----------------------|------------------------------|---------------------------|-------------------------------------------------------------------------|-------------|-----------------------|-------|---------|-----------------|---------------------|---------------------------------------|----|-----|---------|---------|---------|---------|
|                       |                              |                           |                                                                         |             |                       |       |         |                 |                     | CaM                                   | RI | ITS | gpb1    | gpb2    | gpf     | ns2     |
| LC18728 = HSI.688     | FFSC                         | <i>F. avenaceum</i>       | China, Yunnan Province, Baoshan City (E98.85, N25.19)                   | YN_2_Corn   | Subtropical monsoon   | Maize | MR      | 2 Oct. 2020     | W.W. Duan           | Q125469                               | —  | —   | Q125862 | Q126516 | Q126487 | Q126380 |
| LC18414 = HSI.210     | FFSC                         | <i>F. avenaceum</i>       | China, Xinjiang Uygur Autonomous Region, Akay district (E86.86, N47.7)  | XJ_1_Corn   | Temperate continental | Maize | MR      | 18 Oct. 2020    | W.Z. Li             | Q125555                               | —  | —   | Q125863 | Q126087 | Q126488 | Q126380 |
| LC18086 = HSI.994     | FFSC                         | <i>F. avenaceum</i>       | China, Shanxi Province, Yanggao City (E113.55, N37.88)                  | SH_1_Corn   | Temperate monsoon     | Maize | MR      | 6 Oct. 2020     | Y.J. Li             | Q125568                               | —  | —   | Q125804 | Q126489 | Q126487 | Q126225 |
| LC18622 = HSI.433     | FFSC                         | <i>F. avenaceum</i>       | China, Shandong Province, Ziboheing City (E117, N36.03)                 | SD_8_Corn   | Temperate monsoon     | Maize | MR      | 26 Sep. 2020    | Q. Lin              | Q125561                               | —  | —   | Q125791 | Q126251 | Q126481 | Q126222 |
| LC18355 = HSI.1877    | FFSC                         | <i>F. avenaceum</i>       | China, Shandong Province, Weifang City (E119.79, N36.23)                | SD_22_Wheat | Temperate monsoon     | Wheat | FRB     | 18 May 2021     | P. Shen             | Q125593                               | —  | —   | Q125775 | Q126485 | Q126481 | Q126271 |
| LC18753 = HSI.734     | FFSC                         | <i>F. avenaceum</i>       | China, Shandong Province, Weifang City (E119.75, N36.25)                | SD_32_Corn  | Temperate monsoon     | Maize | MSR     | 9 Oct. 2020     | P. Shen             | Q125549                               | —  | —   | Q125798 | Q126486 | Q125998 | Q126251 |
| LC18802 = HSI.894     | FFSC                         | <i>F. avenaceum</i>       | China, Shandong Province, Taian City (E117.16, N36.16)                  | SD_3_Corn   | Temperate monsoon     | Maize | MR      | 3 Oct. 2020     | Z.R. Zhang          | Q125567                               | —  | —   | Q125802 | Q126483 | Q126259 | Q126220 |
| LC18799 = HSI.882     | FFSC                         | <i>F. avenaceum</i>       | China, Shandong Province, Taian City (E117.1, N35.87)                   | SD_4A_Corn  | Temperate monsoon     | Maize | MR      | 1 Oct. 2020     | L.Y. Ji             | Q125589                               | —  | —   | Q125801 | Q126484 | Q126357 | Q126263 |
| LC18803 = HSI.896     | FFSC                         | <i>F. avenaceum</i>       | China, Shandong Province, Taian City (E116.87, N35.99)                  | SD_15_Corn  | Temperate monsoon     | Maize | MR      | 6 Oct. 2020     | L.Y. Ji             | Q125596                               | —  | —   | Q125803 | Q126459 | Q126264 | Q126226 |
| LC18390 = HSI.2041    | FFSC                         | <i>F. avenaceum</i>       | China, Shandong Province, Rizhao City (E119.23, N35.44)                 | SD_2_Corn   | Temperate monsoon     | Maize | MR      | 3 Oct. 2020     | A.Y. Rao            | Q125597                               | —  | —   | Q125811 | Q126486 | Q126218 | Q126268 |
| LC18801 = HSI.891     | FFSC                         | <i>F. avenaceum</i>       | China, Shandong Province, Jinan City (E117.1, N36.39)                   | SD_7_Corn   | Temperate monsoon     | Maize | MR      | 29 Sep. 2020    | X.Y. Liu            | Q125617                               | —  | —   | Q125807 | Q126506 | Q126388 | Q126255 |
| LC18776 = HSI.740     | FFSC                         | <i>F. avenaceum</i>       | China, Shandong Province, Dezhou City (E117.06, N37.65)                 | SD_11_Corn  | Temperate monsoon     | Maize | MR      | 12 Oct. 2020    | L.L. Liu            | Q125568                               | —  | —   | Q125799 | Q126481 | Q125995 | Q126227 |
| LC18804 = HSI.898     | FFSC                         | <i>F. avenaceum</i>       | China, Shandong Province, Dezhou City (E116.34, N37.17)                 | SD_10_Corn  | Temperate monsoon     | Maize | MSR     | 13 Oct. 2020    | K. Guo              | Q125577                               | —  | —   | Q125825 | Q126484 | Q126259 | Q126219 |
| LC18751 = HSI.2631    | FFSC                         | <i>F. avenaceum</i>       | China, Shaanxi Province, Weinan City (E109.76, N35.34)                  | ShX_1_Corn  | Temperate monsoon     | Maize | MR      | 21 Nov. 2020    | Y. Li               | Q125610                               | —  | —   | Q125787 | Q126446 | Q126394 | Q126248 |
| LC18392 = HSI.2026    | FFSC                         | <i>F. avenaceum</i>       | China, Shaanxi Province, Baoji City (E107.6, N34.41)                    | ShX_3_Corn  | Temperate monsoon     | Maize | MR      | 8 Oct. 2020     | Y. Zhou             | Q125615                               | —  | —   | Q125777 | Q126475 | Q126388 | Q126256 |
| LC18757 = HSI.2664    | FFSC                         | <i>F. avenaceum</i>       | China, Liaoning Province, Tieling City (E124, N42.79)                   | LN_1_Corn   | Temperate monsoon     | Maize | MR      | 7 Oct. 2020     | Y.J. Li             | Q125612                               | —  | —   | Q125788 | Q126484 | Q126352 | Q126315 |
| LC18790 = HSI.2017    | FFSC                         | <i>F. avenaceum</i>       | China, Liaoning Province, Fushin City (E121.73, N42.15)                 | LN_6_Corn   | Temperate monsoon     | Maize | MR      | 10 Oct. 2020    | W. Zhao             | Q125594                               | —  | —   | Q125776 | Q126477 | Q126360 | Q126264 |
| LC18829 = HSI.548     | FFSC                         | <i>F. avenaceum</i>       | China, Jilin Province, Siping City (E124.33, N43.7)                     | GL_7_Rice   | Temperate monsoon     | Rice  | ISR     | 13 Oct. 2020    | Y.L. Guo & R.H. Shi | Q125598                               | —  | —   | Q125838 | Q126502 | Q126313 | Q126276 |
| LC18757 = HSI.2062    | FFSC                         | <i>F. avenaceum</i>       | China, Jilin Province, Siping City (E123.97, N43.34)                    | GL_2_Rice   | Temperate monsoon     | Maize | MR      | 13 Oct. 2020    | Y.L. Guo & R.H. Shi | Q125603                               | —  | —   | Q125786 | Q126503 | Q125992 | Q126252 |
| LC18726 = HSI.682     | FFSC                         | <i>F. avenaceum</i>       | China, Jilin Province, Changchun City (E125.81, N44.05)                 | GL_4_Corn   | Temperate monsoon     | Maize | MR      | 9 Oct. 2020     | J.Z. Feng           | Q125616                               | —  | —   | Q125866 | Q126510 | Q126389 | Q126301 |
| LC18796 = HSI.642     | FFSC                         | <i>F. avenaceum</i>       | China, Jilin Province, Changchun City (E125.39, N43.95)                 | GL_5_Corn   | Temperate monsoon     | Maize | MR      | 9 Oct. 2020     | J.Z. Feng           | Q125571                               | —  | —   | Q125795 | Q126505 | Q126388 | Q126288 |
| LC18807 = HSI.515     | FFSC                         | <i>F. avenaceum</i>       | China, Jiangsu Province, Yangzhou City (E119.75, N32.63)                | JR_6_Corn   | Temperate monsoon     | Maize | MR      | 21 Sep. 2020    | S.L. Han            | Q125592                               | —  | —   | Q125823 | Q126489 | Q126309 | Q126291 |
| LC18472 = HSI.2386    | FFSC                         | <i>F. avenaceum</i>       | China, Jiangsu Province, Taizhou City (E120.61, N32.5)                  | JR_11B_Corn | Temperate monsoon     | Maize | MSR     | 21 Sep. 2020    | S.L. Han            | Q125585                               | —  | —   | Q125789 | Q126493 | Q125999 | Q126266 |
| LC18448 = HSI.2361    | FFSC                         | <i>F. avenaceum</i>       | China, Jiangsu Province, Taizhou City (E119.99, N32.37)                 | JR_36_Rice  | Temperate monsoon     | Rice  | ISR     | 21 Sep. 2020    | S.L. Han            | Q125546                               | —  | —   | Q125779 | Q126500 | Q126344 | Q126266 |
| LC18627 = HSI.445     | FFSC                         | <i>F. avenaceum</i>       | China, Jiangsu Province, Taizhou City (E119.86, N32.47)                 | JR_51_Wheat | Temperate monsoon     | Wheat | FRB     | 21 Sep. 2020    | S.L. Han            | Q125578                               | —  | —   | Q125792 | Q126450 | Q126355 | Q126228 |
| LC18774 = HSI.799     | FFSC                         | <i>F. avenaceum</i>       | China, Jiangsu Province, Nanjing City (E118.09, N31.02)                 | JR_3A_Corn  | Temperate monsoon     | Maize | MR      | 18 Sep. 2020    | S.L. Han            | Q125579                               | —  | —   | —       | Q126452 | Q126315 | Q126282 |
| LC18762 = HSI.792     | FFSC                         | <i>F. avenaceum</i>       | China, Jiangsu Province, Nanjing City (E118.07, N31.03)                 | JR_40_Rice  | Subtropical monsoon   | Rice  | ISR     | 18 Sep. 2020    | S.L. Han            | Q125551                               | —  | —   | Q125835 | Q126449 | Q126353 | Q126259 |
| LC18658 = HSI.517_D01 | FFSC                         | <i>F. avenaceum</i>       | China, Jiangsu Province, Lianyungang City (E119.11, N34.46)             | JR_2A_Corn  | Temperate monsoon     | Maize | MR      | 19 Sep. 2020    | S.L. Han            | Q125647                               | —  | —   | Q125824 | Q126482 | Q126323 | Q126279 |
| LC18424 = HSI.2164    | FFSC                         | <i>F. avenaceum</i>       | China, Jiangsu Province, Lianyungang City (E119.11, N34.46)             | JR_48_Wheat | Temperate monsoon     | Wheat | FRB     | 19 Sep. 2020    | S.L. Han            | Q125583                               | —  | —   | —       | Q126451 | Q126306 | Q126235 |
| LC1883 = HSI.952      | FFSC                         | <i>F. avenaceum</i>       | China, Jiangsu Province, Lianyungang City (E119.09, N34.5)              | JR_26A_Corn | Temperate monsoon     | Maize | MSR     | 19 Sep. 2020    | S.L. Han            | Q125559                               | —  | —   | Q125809 | Q126492 | Q125997 | Q126273 |
| LC18790 = HSI.668     | FFSC                         | <i>F. avenaceum</i>       | China, Jiangsu Province, Lianyungang City (E119.02, N34.46)             | JR_24A_Corn | Temperate monsoon     | Maize | MR      | 19 Sep. 2020    | S.L. Han            | Q125591                               | —  | —   | Q125836 | Q126495 | Q126311 | Q126224 |
| LC18430 = HSI.2223    | FFSC                         | <i>F. avenaceum</i>       | China, Jiangsu Province, Lianyungang City (E118.95, N34.5)              | JR_29_Rice  | Temperate monsoon     | Rice  | ISR     | 19 Sep. 2020    | S.L. Han            | Q125584                               | —  | —   | Q125778 | Q126478 | Q126344 | Q126237 |
| LC18646 = HSI.492     | FFSC                         | <i>F. avenaceum</i>       | China, Jiangsu Province, Lianyungang City (E118.84, N34.5)              | JR_22A_Corn | Temperate monsoon     | Maize | MR      | 19 Sep. 2020    | S.L. Han            | Q125553                               | —  | —   | Q125833 | Q126498 | Q126354 | Q126269 |
| LC18677 = HSI.548     | FFSC                         | <i>F. avenaceum</i>       | China, Jiangsu Province, Lianyungang City (E118.83, N34.5)              | JR_59_Wheat | Temperate monsoon     | Wheat | FRB     | 19 Sep. 2020    | S.L. Han            | Q125558                               | —  | —   | Q125794 | Q126488 | Q126359 | Q126224 |
| LC18654 = HSI.595     | FFSC                         | <i>F. avenaceum</i>       | China, Jiangsu Province, Huaiyin City (E119.14, N33.83)                 | JR_18A_Corn | Temperate monsoon     | Maize | MSR     | 20 Sep. 2020    | S.L. Han            | Q125602                               | —  | —   | Q125828 | Q126470 | Q126343 | Q126278 |
| LC18653 = HSI.592     | FFSC                         | <i>F. avenaceum</i>       | China, Jiangsu Province, Huaiyin City (E119.11, N33.74)                 | JR_19A_Corn | Temperate monsoon     | Maize | MR      | 20 Sep. 2020    | S.L. Han            | Q125601                               | —  | —   | Q125834 | Q126491 | Q126341 | Q126258 |
| LC18647 = HSI.493     | FFSC                         | <i>F. avenaceum</i>       | China, Jiangsu Province, Huaiyin City (E119.1, N33.69)                  | JR_44_Rice  | Temperate monsoon     | Rice  | ISR     | 20 Sep. 2020    | S.L. Han            | Q125611                               | —  | —   | Q125822 | Q126486 | Q126356 | Q126317 |
| LC18655 = HSI.597     | FFSC                         | <i>F. avenaceum</i>       | China, Jiangsu Province, Huaiyin City (E119.02, N33.61)                 | JR_16B_Corn | Temperate monsoon     | Maize | MR      | 20 Sep. 2020    | S.L. Han            | Q125576                               | —  | —   | Q125793 | Q126461 | Q126359 | Q126275 |
| LC18833 = HSI.955     | FFSC                         | <i>F. avenaceum</i>       | China, Jiangsu Province, Huaiyin City (E118.99, N33.80)                 | JR_15A_Corn | Temperate monsoon     | Maize | MR      | 20 Sep. 2020    | S.L. Han            | Q125552                               | —  | —   | Q125810 | Q126487 | Q126357 | Q126262 |
| LC18485 = HSI.2098    | FFSC                         | <i>F. avenaceum</i>       | China, Jiangsu Province, Huaiyin City (E118.99, N33.80)                 | JR_42_Rice  | Temperate monsoon     | Rice  | ISR     | 20 Sep. 2020    | S.L. Han            | Q125575                               | —  | —   | Q125814 | Q126476 | Q126354 | Q126267 |
| LC18486 = HSI.2102    | FFSC                         | <i>F. avenaceum</i>       | China, Jiangsu Province, Huaiyin City (E118.94, N33.82)                 | JR_14_Corn  | Temperate monsoon     | Maize | MR      | 20 Sep. 2020    | S.L. Han            | Q125554                               | —  | —   | —       | Q126322 | Q126328 | Q126329 |
| LC18821 = HSI.932     | FFSC                         | <i>F. avenaceum</i>       | China, Jiangsu Province, Huaiyin City (E118.93, N33.63)                 | JR_12A_Corn | Temperate monsoon     | Maize | MR      | 20 Sep. 2020    | S.L. Han            | Q125600                               | —  | —   | Q125826 | Q126457 | Q126321 | Q126261 |
| LC18740 = HSI.719     | FFSC                         | <i>F. avenaceum</i>       | China, Jiangsu Province, Dongtai City (E120.42, N32.83)                 | JR_32_Rice  | Temperate monsoon     | Rice  | ISR     | 9 Oct. 2020     | J.Y. Liang          | Q125569                               | —  | —   | Q125797 | Q126489 | Q126311 | Q126282 |
| LC18737 = HSI.661     | FFSC                         | <i>F. avenaceum</i>       | China, Inner Mongolia Autonomous Region, Chifeng City (E119.01, N42.75) | HN_3_Corn   | Temperate continental | Maize | MR      | 15 Oct. 2020    | Z.H. Qi             | Q125545                               | —  | —   | Q125796 | Q126445 | Q125991 | Q126218 |
| LC18582 = HSI.251     | FFSC                         | <i>F. avenaceum</i>       | China, Hunan Province, Yangyao City (E112.74, N26.47)                   | HN_3A_Corn  | Subtropical monsoon   | Maize | MSR     | 13 Aug. 2020    | S.L. Han            | Q125613                               | —  | —   | Q125785 | Q126468 | Q125996 | Q126238 |
| LC18589 = HSI.2033    | FFSC                         | <i>F. avenaceum</i>       | China, Hunan Province, Hongyang City (E112, N26.79)                     | HN_5_Corn   | Subtropical monsoon   | Maize | MSR     | 25 Jan. 2021    | T. Qiu              | Q125596                               | —  | —   | Q125816 | Q126494 | Q126393 | Q126280 |
| LC18600 = HSI.2975    | FFSC                         | <i>F. avenaceum</i>       | China, Hunan Province, Yueyang City (E115.4, N31.62)                    | HN_30_Corn  | Temperate monsoon     | Maize | MR      | 26 May 2021     | Y. Chen             | Q125599                               | —  | —   | Q125820 | Q126454 | Q126305 | Q126281 |
| LC18497 = HSI.2496    | FFSC                         | <i>F. avenaceum</i>       | China, Hunan Province, Anyang City (E114.78, N35.39)                    | HN_14_Corn  | Temperate monsoon     | Maize | MR      | 12 Oct. 2020    | S.Y. Wang           | Q125588                               | —  | —   | Q125784 | Q126472 | Q126389 | Q126321 |
| LC18473 = HSI.2396    | FFSC                         | <i>F. avenaceum</i>       | China, Hunan Province, Anyang City (E114.78, N35.37)                    | HN_7_Corn   | Temperate monsoon     | Maize | MR      | 12 Oct. 2020    | S.Y. Wang           | Q125605                               | —  | —   | Q125864 | Q126508 | Q126345 | Q126228 |
| LC18496 = HSI.2492    | FFSC                         | <i>F. avenaceum</i>       | China, Hunan Province, Anyang City (E114.78, N35.36)                    | HN_15_Corn  | Temperate monsoon     | Maize | MR      | 12 Oct. 2020    | S.Y. Wang           | Q125559                               | —  | —   |         |         |         |         |

|                                   |      |                         |                                                                        |             |                       |       |     |              |                       |          |   |   |          |          |          |          |
|-----------------------------------|------|-------------------------|------------------------------------------------------------------------|-------------|-----------------------|-------|-----|--------------|-----------------------|----------|---|---|----------|----------|----------|----------|
| LC1858 ~ HS1202                   | FFSC | <i>F. fuliginea</i>     | China, Hunan Province, Hongyang City (E112, N26.79)                    | HN_5_Corn   | Subtropical monsoon   | Male  | MSR | 25 Jan. 2021 | T. Qiu                | 0Q125626 | — | — | 0Q125842 | 0Q126543 | 0Q126085 | 0Q126242 |
| LC1859 ~ HS1208                   | FFSC | <i>F. fuliginea</i>     | China, Henan Province, Xuyang City (E115.35, N31.62)                   | HN_21_Rice  | Subtropical monsoon   | Rice  | BSR | 26 Aug. 2021 | Y. Chen               | 0Q125637 | — | — | —        | 0Q126538 | 0Q126086 | 0Q126299 |
| LC1854 ~ HS1209                   | FFSC | <i>F. fuliginea</i>     | China, Guangxi Zhuang Autonomous Region, Hechi City (E108.71, N24.4)   | GX_6_Corn   | Subtropical monsoon   | Male  | MSR | 12 Jan. 2021 | R.L. Wei & Y.S. Fan   | 0Q125625 | — | — | 0Q125941 | 0Q126135 | 0Q126084 | 0Q126345 |
| LC1859 ~ HS1207                   | FFSC | <i>F. fuliginea</i>     | China, Guangdong Province, Meizhou City (E116.3, N24.52)               | GD_38_Corn  | Subtropical monsoon   | Male  | MSR | 7 Jun. 2021  | Y.M. Wu               | 0Q125627 | — | — | 0Q125845 | 0Q126532 | 0Q126087 | 0Q126276 |
| LC1841 ~ HS1213                   | FFSC | <i>F. fuliginea</i>     | China, Fujian Province, Longyan City (E117.04, N23.1)                  | FJ_4_Rice   | Subtropical monsoon   | Rice  | BSR | 7 Oct. 2020  | Y.J. Li               | 0Q125623 | — | — | 0Q125840 | 0Q126546 | 0Q126083 | 0Q126294 |
| LC1814 ~ HS1212                   | FFSC | <i>F. fuliginea</i>     | China, Fujian Province, Fuzhou City (E119.24, N26.08)                  | FJ_2_Rice   | Subtropical monsoon   | Rice  | BSR | 6 Oct. 2020  | J.Y. Su               | 0Q125619 | — | — | 0Q125844 | 0Q126536 | 0Q126081 | 0Q126309 |
| LC1861 ~ HS12078                  | FFSC | <i>F. fuliginea</i>     | China, Beijing, Miyun District (E116.84, N40.38)                       | BJ_2_Corn   | Temperate monsoon     | Male  | MSR | 15 Sep. 2021 | S.L. Han              | 0Q125628 | — | — | 0Q125846 | 0Q126536 | 0Q126075 | 0Q126310 |
| LC1848 ~ HS1248                   | FFSC | <i>F. plenum</i>        | China, Jiangsu Province, Taizhou City (E119.86, N32.47)                | JS_51_Wheat | Temperate monsoon     | Wheat | FHB | 21 Sep. 2020 | S.L. Han              | 0Q125680 | — | — | 0Q125874 | 0Q126560 | 0Q126122 | 0Q126349 |
| LC1845 ~ HS1232                   | FFSC | <i>F. plenum</i>        | China, Jiangsu Province, Taizhou City (E119.86, N32.47)                | JS_8A_Corn  | Temperate monsoon     | Male  | MSR | 21 Sep. 2020 | S.L. Han              | 0Q125676 | — | — | 0Q125873 | 0Q126559 | 0Q126121 | 0Q126348 |
| LC1877 ~ HS1712                   | FFSC | <i>F. plenum</i>        | China, Jiangsu Province, Liangzihuang City (E119.02, N34.46)           | JS_20R_Corn | Temperate monsoon     | Male  | MSR | 19 Sep. 2020 | S.L. Han              | 0Q125681 | — | — | 0Q125877 | 0Q126578 | 0Q126123 | 0Q126353 |
| LC1854 ~ HS12397_D02              | FFSC | <i>F. plenum</i>        | China, Hainan Province, Sanya City (E109.75, N18.39)                   | HAN_1_Corn  | Tropical monsoon      | Male  | MSR | 6 Feb. 2021  | Y.J. Li               | 0Q125675 | — | — | 0Q125876 | 0Q126557 | 0Q126127 | 0Q126444 |
| C2M5C3.23517 Y ~ LC1309 ~ HS12645 | FFSC | <i>F. plenum</i>        | China, Guangdong Province, Qingyuan City (E113.42, N24.19)             | GD_1_Corn   | Subtropical monsoon   | Male  | MSR | 21 Nov. 2020 | S.Q. Wang             | 0Q125677 | — | — | 0Q125871 | 0Q126555 | 0Q126125 | 0Q126352 |
| LC1841 ~ HS12126                  | FFSC | <i>F. plenum</i>        | China, Guangdong Province, Qingyuan City (E113.24, N26.08)             | FJ_2_Rice   | Subtropical monsoon   | Rice  | BSR | 6 Oct. 2020  | J.Y. Su               | 0Q125679 | — | — | 0Q125872 | 0Q126561 | 0Q126124 | 0Q126359 |
| LC1879 ~ HS12905                  | FFSC | <i>F. plenum</i>        | China, Chongqing, Tongnan District (E105.84, N30.17)                   | CQ_1_Corn   | Subtropical monsoon   | Male  | MSR | 23 Jan. 2021 | X.H. Xu               | 0Q125678 | — | — | 0Q125875 | 0Q126556 | 0Q126126 | 0Q126351 |
| LC1836 ~ HS12714                  | FFSC | <i>F. sacchari</i>      | China, Hainan Province, Liqiao County (E105.6, N19.69)                 | HAN_2_Rice  | Tropical monsoon      | Rice  | BSR | 27 Nov. 2020 | X.Q. Liu              | 0Q125683 | — | — | 0Q125968 | 0Q126532 | 0Q126089 | 0Q126316 |
| LC1853 ~ HS12838                  | FFSC | <i>F. sacchari</i>      | China, Guangxi Zhuang Autonomous Region, Hechi City (E108.71, N24.4)   | GX_6_Corn   | Subtropical monsoon   | Male  | MSR | 12 Jan. 2021 | R.L. Wei & Y.S. Fan   | 0Q125669 | — | — | 0Q125969 | 0Q126539 | 0Q126096 | 0Q126324 |
| LC1874 ~ HS12875                  | FFSC | <i>F. sacchari</i>      | China, Guangxi Zhuang Autonomous Region, Hechi City (E108.63, N24.53)  | GX_3_Corn   | Subtropical monsoon   | Male  | MSR | 12 Jan. 2021 | R.L. Wei & Y.S. Fan   | 0Q125651 | — | — | 0Q125978 | 0Q126551 | 0Q126098 | 0Q126327 |
| LC1833 ~ HS12708                  | FFSC | <i>F. sacchari</i>      | China, Guangdong Province, Qingyuan City (E113.42, N24.19)             | GD_1_Corn   | Subtropical monsoon   | Male  | MSR | 21 Nov. 2020 | S.Q. Wang             | 0Q125652 | — | — | 0Q125967 | 0Q126554 | 0Q126097 | 0Q126328 |
| LC1832 ~ HS12638                  | FFSC | <i>F. sacchari</i>      | China, Guangdong Province, Qingyuan City (E113.42, N24.19)             | GD_1_Corn   | Subtropical monsoon   | Male  | MSR | 21 Nov. 2020 | S.Q. Wang             | 0Q125654 | — | — | —        | 0Q126553 | 0Q126099 | 0Q126325 |
| C2M5C3.23522 Y ~ LC1309 ~ HS12737 | FFSC | <i>F. sanyansea</i>     | China, Hainan Province, Sanya City (E109.75, N18.39)                   | HAN_1_Corn  | Tropical monsoon      | Male  | MSR | 6 Feb. 2021  | Y.J. Li               | 0Q125647 | — | — | 0Q125869 | 0Q126547 | 0Q126093 | 0Q126322 |
| LC1850 ~ HS12741_D0               | FFSC | <i>F. sanyansea</i>     | China, Hainan Province, Sanya City (E109.75, N18.39)                   | HAN_1_Corn  | Tropical monsoon      | Male  | MSR | 6 Feb. 2021  | Y.J. Li               | 0Q125642 | — | — | 0Q125861 | 0Q126549 | 0Q126095 | 0Q126388 |
| LC1837 ~ HS12738                  | FFSC | <i>F. sanyansea</i>     | China, Hainan Province, Sanya City (E109.75, N18.39)                   | HAN_1_Corn  | Tropical monsoon      | Male  | MSR | 6 Feb. 2021  | Y.J. Li               | 0Q125643 | — | — | 0Q125860 | 0Q126548 | 0Q126094 | 0Q126323 |
| LC1871 ~ HS1696                   | FFSC | <i>F. subglutinosa</i>  | China, Shaanxi Province, Xi'anhuo City (E112.9, N36.47)                | SN_28_Corn  | Temperate monsoon     | Male  | MSR | 1 Oct. 2020  | C. Ju                 | 0Q125671 | — | — | 0Q125982 | 0Q126603 | 0Q126109 | 0Q126345 |
| LC1804 ~ HS12463                  | FFSC | <i>F. subglutinosa</i>  | China, Shandong Province, Yantai City (E121.51, N37.25)                | SD_6A_Corn  | Temperate monsoon     | Male  | MSR | 1 Oct. 2020  | Q.Y. Yu               | 0Q125668 | — | — | 0Q125973 | 0Q126603 | 0Q126112 | 0Q126344 |
| LC1832 ~ HS12706                  | FFSC | <i>F. subglutinosa</i>  | China, Shaanxi Province, Weinan City (E109.76, N35.34)                 | SN_1_Corn   | Temperate monsoon     | Male  | MSR | 2 Dec. 2020  | Y. Li                 | 0Q125658 | — | — | 0Q125974 | 0Q126605 | 0Q126104 | 0Q126337 |
| LC1863 ~ HS1959                   | FFSC | <i>F. subglutinosa</i>  | China, Qinghai Province, Haidong City (E102.59, N36.63)                | QH_3A_Corn  | Plateau monsoon       | Male  | MSR | 5 Oct. 2020  | Y.M. Han              | 0Q125663 | — | — | 0Q125978 | 0Q126609 | 0Q126110 | 0Q126335 |
| LC1862 ~ HS1962                   | FFSC | <i>F. subglutinosa</i>  | China, Liaoning Province, Fusha City (E121.73, N42.13)                 | LN_8_Corn   | Temperate monsoon     | Male  | MSR | 10 Oct. 2020 | W. Zhao               | 0Q125673 | — | — | 0Q125979 | 0Q126607 | 0Q126111 | 0Q126336 |
| LC1875 ~ HS1287                   | FFSC | <i>F. subglutinosa</i>  | China, Inner Mongolia Autonomous Region, Hohhot City (E111.77, N40.82) | NMG_2_Wheat | Temperate continental | Wheat | FHB | 18 Oct. 2020 | W.Z. Li               | 0Q125667 | — | — | 0Q125975 | 0Q126606 | 0Q126106 | 0Q126341 |
| LC1829 ~ HS1479_D01               | FFSC | <i>F. subglutinosa</i>  | China, Heilongjiang Province, Yichun City (E128.06, N46.96)            | HLJ_2_Corn  | Temperate monsoon     | Male  | MSR | 17 Oct. 2020 | Z.Q. Liu              | 0Q125674 | — | — | 0Q125971 | 0Q126671 | 0Q126108 | 0Q126342 |
| LC1808 ~ HS1907                   | FFSC | <i>F. subglutinosa</i>  | China, Gansu Province, Qingyong City (E107.28, N35.69)                 | GS_38_Corn  | Temperate continental | Male  | MSR | 6 Oct. 2020  | Y.F. Ma               | 0Q125664 | — | — | 0Q125976 | 0Q126605 | 0Q126102 | 0Q126329 |
| LC1847 ~ HS12317                  | FFSC | <i>F. subglutinosa</i>  | China, Gansu Province, Qingyong City (E107.28, N35.68)                 | GS_5_Corn   | Temperate continental | Male  | MSR | 6 Oct. 2020  | Y.F. Ma               | 0Q125665 | — | — | 0Q125972 | 0Q126604 | 0Q126107 | 0Q126338 |
| LC1840 ~ HS1965                   | FFSC | <i>F. subglutinosa</i>  | China, Gansu Province, Baijia City (E104.85, N37.12)                   | GS_2_Corn   | Temperate continental | Male  | MSR | 5 Jul. 2020  | S.Z. Zhang            | 0Q125666 | — | — | 0Q125990 | 0Q126602 | 0Q126105 | 0Q126340 |
| LC1810 ~ HS1910                   | FFSC | <i>F. subglutinosa</i>  | China, Gansu Province, Baijia City (E104.83, N37.09)                   | GS_3_Corn   | Temperate continental | Male  | MSR | 5 Jul. 2020  | S.Z. Zhang            | 0Q125665 | — | — | 0Q125977 | 0Q126601 | 0Q126103 | 0Q126339 |
| LC1816 ~ HS12981                  | FFSC | <i>F. subglutinosa</i>  | China, Beijing, Miyun District (E116.84, N40.38)                       | BJ_2_Corn   | Temperate monsoon     | Male  | MSR | 15 Sep. 2021 | S.L. Han              | 0Q125669 | — | — | 0Q125983 | 0Q126608 | 0Q126113 | 0Q126343 |
| LC1813 ~ HS1820                   | FFSC | <i>F. temperata</i>     | China, Yunnan Province, Nuozuo City (E104.49, N26.37)                  | YN_1_Corn   | Subtropical monsoon   | Male  | MSR | 11 Oct. 2020 | X. Li                 | 0Q125672 | — | — | 0Q125989 | 0Q126670 | 0Q126110 | 0Q126332 |
| LC1812 ~ HS1914                   | FFSC | <i>F. temperata</i>     | China, Yunnan Province, Qijiang City (E104.26, N25.2)                  | YN_3_Corn   | Subtropical monsoon   | Male  | MSR | 6 Oct. 2020  | R.X. Yang             | 0Q125660 | — | — | 0Q125988 | 0Q126606 | 0Q126117 | 0Q126334 |
| LC1845 ~ HS12313                  | FFSC | <i>F. temperata</i>     | China, Shaanxi Province, Manqiang City (E105.15, N31.70)               | SN_18_Corn  | Subtropical monsoon   | Male  | MSR | 4 Oct. 2020  | M.L. Feng             | 0Q125662 | — | — | 0Q125984 | 0Q126605 | 0Q126120 | 0Q126333 |
| LC1808 ~ HS12641                  | FFSC | <i>F. temperata</i>     | China, Heilongjiang Province, Yichun City (E128.06, N46.96)            | HLJ_2_Corn  | Temperate monsoon     | Male  | MSR | 17 Oct. 2020 | Z.Q. Liu              | 0Q125670 | — | — | 0Q125985 | 0Q126606 | 0Q126114 | 0Q126347 |
| LC1851 ~ HS12704                  | FFSC | <i>F. temperata</i>     | China, Heilongjiang Province, Mudanjiang City (E130.16, N44.41)        | HLJ_1_Corn  | Temperate monsoon     | Male  | MSR | 6 Nov. 2020  | W.J. Dong & L.Z. Zhao | 0Q125670 | — | — | 0Q125986 | 0Q126607 | 0Q126115 | 0Q126331 |
| LC1878 ~ HS1856                   | FFSC | <i>F. temperata</i>     | China, Gansu Province, Baijia City (E104.83, N37.09)                   | GS_3_Corn   | Temperate continental | Male  | MSR | 5 Jul. 2020  | S.Z. Zhang            | 0Q125667 | — | — | 0Q125990 | 0Q126608 | 0Q126116 | 0Q126346 |
| LC1857 ~ HS12964                  | FFSC | <i>F. temperata</i>     | China, Chongqing, Tongnan District (E105.84, N30.17)                   | CQ_1_Corn   | Subtropical monsoon   | Male  | MSR | 23 Jan. 2021 | X.H. Xu               | 0Q125661 | — | — | 0Q125987 | 0Q126604 | 0Q126119 | 0Q126339 |
| LC1872 ~ HS1646                   | FFSC | <i>F. verticillides</i> | China, Yunnan Province, Baoshan City (E98.85, N25.19)                  | YN_2_Corn   | Subtropical monsoon   | Male  | MSR | 2 Oct. 2020  | W.W. Duan             | 0Q125707 | — | — | 0Q125935 | 0Q126714 | 0Q126103 | 0Q126388 |
| LC1879 ~ HS1694                   | FFSC | <i>F. verticillides</i> | China, Yunnan Province, Baoshan City (E98.8, N24.86)                   | YN_4_Corn   | Subtropical monsoon   | Male  | MSR | 2 Oct. 2020  | W.W. Duan             | 0Q125724 | — | — | 0Q125961 | 0Q126718 | 0Q126120 | 0Q126381 |
| LC1828 ~ HS1471                   | FFSC | <i>F. verticillides</i> | China, Shaanxi Province, Manqiang City (E105.15, N31.70)               | SN_18_Corn  | Subtropical monsoon   | Male  | MSR | 4 Oct. 2020  | M.L. Feng             | 0Q125761 | — | — | 0Q125978 | 0Q126705 | 0Q126126 | 0Q126443 |
| LC1838 ~ HS12013                  | FFSC | <i>F. verticillides</i> | China, Shaanxi Province, Yanggao City (E105.15, N37.80)                | SN_1_Corn   | Temperate monsoon     | Male  | MSR | 6 Oct. 2020  | Y.J. Li               | 0Q125732 | — | — | 0Q125979 | 0Q126707 | 0Q126120 | 0Q126416 |
| LC1870 ~ HS1695                   | FFSC | <i>F. verticillides</i> | China, Shaanxi Province, Xi'anhuo City (E112.9, N36.47)                | SN_2A_Corn  | Temperate monsoon     | Male  | MSR | 1 Oct. 2020  | C. Ju                 | 0Q125764 | — | — | 0Q125976 | 0Q126701 | 0Q126118 | 0Q126378 |
| LC1804 ~ HS1809                   | FFSC | <i>F. verticillides</i> | China, Shandong Province, Zibo City (E117, N35.03)                     | SD_8_Corn   | Temperate monsoon     | Male  | MSR | 26 Sep. 2020 | Q. Liu                | 0Q125711 | — | — | 0Q125953 | 0Q126708 | 0Q126109 | 0Q126408 |
| LC1874 ~ HS12604                  | FFSC | <i>F. verticillides</i> | China, Shandong Province, Yantai City (E121.51, N37.25)                | SD_6A_Corn  | Temperate monsoon     | Male  | MSR | 2 Oct. 2020  | Q.Y. Yu               | 0Q125744 | — | — | 0Q125882 | 0Q126744 | 0Q126107 | 0Q126376 |
| LC1875 ~ HS1735                   | FFSC | <i>F. verticillides</i> | China, Shandong Province, Weifang City (E119.75, N36.25)               | SD_12_Corn  | Temperate monsoon     | Male  | MSR | 9 Oct. 2020  | P. Shou               | 0Q125784 | — | — | 0Q125942 | 0Q126743 | 0Q126114 | 0Q126372 |
| LC1841 ~ HS12148                  | FFSC | <i>F. verticillides</i> | China, Shandong Province, Taian City (E117.31, N36.22)                 | SD_5_Corn   | Temperate monsoon     | Male  | MSR | 1 Oct. 2020  | L. Zhao & L. Yu       | 0Q125748 | — | — | 0Q125968 | 0Q126737 | 0Q126103 | 0Q126414 |
| LC1865 ~ HS12360                  | FFSC | <i>F. verticillides</i> | China, Shandong Province, Taian City (E117.16, N36.16)                 | SD_3_Corn   | Temperate monsoon     | Male  | MSR | 3 Oct. 2020  | Z.B. Zhang            | 0Q125725 | — | — | 0Q125980 | 0Q126708 | 0Q126106 | 0Q126362 |
| LC1877 ~ HS1881                   | FFSC | <i>F. verticillides</i> | China, Shandong Province, Taian City (E117.1, N35.87)                  | SD_4A_Corn  | Temperate monsoon     | Male  | MSR | 1 Oct. 2020  | L.Y. B                | 0Q125695 | — | — | 0Q125945 | 0Q126700 | 0Q126105 | 0Q126349 |
| LC1866 ~ HS12366                  | FFSC | <i>F. verticillides</i> | China, Shandong Province, Taian City (E116.87, N35.99)                 | SD_15_Corn  | Temperate monsoon     | Male  | MSR | 6 Oct. 2020  | L.Y. B                | 0Q125759 | — | — | 0Q125991 | 0Q126702 | 0Q126103 | 0Q126394 |
| LC1870 ~ HS1756                   | FFSC | <i>F. verticillides</i> | China, Shandong Province, Licheng City (E116.01, N36.16)               | SD_9_Corn   | Temperate monsoon     | Male  | MSR | 20 Oct. 2020 | Y. Zhao               | 0Q125694 | — | — | 0Q125944 | 0Q126704 | 0Q126104 | 0Q126385 |
| LC1867 ~ HS12370                  | FFSC | <i>F. verticillides</i> | China, Shandong Province, Jining City (E116.3, N35.52)                 | SD_14_Corn  | Temperate monsoon     | Male  | MSR | 3 Oct. 2020  | Z.L. Li               | 0Q125721 | — | — | 0Q125962 | 0Q126704 | 0Q126107 | 0Q126417 |
| LC1875 ~ HS1738                   | FFSC | <i>F. verticillides</i> | China, Shandong Province, Dezhou City (E117.06, N37.65)                | SD_11_Corn  | Temperate monsoon     | Male  | MSR | 12 Oct. 2020 | L.L. Liu              | 0Q125682 | — | — | 0Q125943 | 0Q126702 | 0Q126112 | 0Q126384 |
| LC1842 ~ HS1976                   | FFSC | <i>F. verticillides</i> | China, Shandong Province, Dezhou City (E116.34, N37.17)                | SD_10_Corn  | Temperate monsoon     | Male  | MSR | 13 Oct. 2020 | K. Guo                | 0Q125749 | — | — | 0Q125954 | 0Q126704 | 0Q126125 | 0Q126364 |
| LC1879 ~ HS12043                  | FFSC | <i>F. verticillides</i> | China, Shandong Province, Dezhou City (E116.2, N37)                    | SD_1_Corn   | Temperate monsoon     | Male  | MSR | 6 Oct. 2020  | R.L. Zhao             | 0Q125722 | — | — | 0Q125883 | 0Q126707 | 0Q126103 | 0Q126395 |
| LC1849 ~ HS12326                  | FFSC | <i>F. verticillides</i> | China, Shaanxi Province, Weinan City (E109.94, N35.37)                 | SN_6_Corn   | Temperate monsoon     | Male  | MSR | 5 Oct. 2020  | L. Wang               | 0Q125714 | — | — | 0Q125894 | 0Q126707 | 0Q126111 | 0Q126344 |
| LC1871 ~ HS12024                  | FFSC | <i>F. verticillides</i> | China, Shaanxi Province, Baqi City (E107.6, N34.41)                    | SN_3_Corn   | Temperate monsoon     | Male  | MSR | 8 Oct. 2020  | Y. Zhao               | 0Q125746 | — | — | 0Q125881 | 0Q126659 | 0Q126109 | 0Q126375 |
| LC1860 ~ HS12374                  | FFSC | <i>F. verticillides</i> | China, Liaoning Province, Tieling City (E124.16, N42.55)               | LN_2_Corn   | Temperate monsoon     |       |     |              |                       |          |   |   |          |          |          |          |

|                                   |       |                          |                                                                        |              |                       |       |     |              |                     |          |   |   |          |          |          |          |
|-----------------------------------|-------|--------------------------|------------------------------------------------------------------------|--------------|-----------------------|-------|-----|--------------|---------------------|----------|---|---|----------|----------|----------|----------|
| LC18434 = HS1.2286                | FFSC  | <i>F. verticilloides</i> | China, Henan Province, Anyang City (E114.75, N35.36)                   | HeN_1_Corn   | Temperate monsoon     | Maize | MER | 12 Oct. 2020 | S.Y. Wang           | OQ125716 | — | — | OQ125898 | OQ126625 | OQ126399 | OQ126384 |
| LC18475 = HS1.2490                | FFSC  | <i>F. verticilloides</i> | China, Henan Province, Anyang City (E114.74, N35.39)                   | HeN_2_Corn   | Temperate monsoon     | Maize | MER | 12 Oct. 2020 | S.Y. Wang           | OQ125708 | — | — | OQ125907 | OQ126659 | OQ126399 | OQ126387 |
| LC18432 = HS1.2302                | FFSC  | <i>F. verticilloides</i> | China, Henan Province, Anyang City (E114.74, N35.37)                   | HeN_2_Corn   | Temperate monsoon     | Maize | MER | 12 Oct. 2020 | S.Y. Wang           | OQ125688 | — | — | OQ125962 | OQ126637 | OQ126397 | OQ126359 |
| LC18430 = HS1.2459                | FFSC  | <i>F. verticilloides</i> | China, Henan Province, Anyang City (E114.74, N35.35)                   | HeN_18_Corn  | Temperate monsoon     | Maize | MER | 12 Oct. 2020 | S.Y. Wang           | OQ125771 | — | — | OQ125910 | OQ126633 | OQ126374 | OQ126383 |
| LC18505 = HS1.2519                | FFSC  | <i>F. verticilloides</i> | China, Henan Province, Anyang City (E114.73, N35.40)                   | HeN_9_Corn   | Temperate monsoon     | Maize | MER | 12 Oct. 2020 | S.Y. Wang           | OQ125728 | — | — | OQ125916 | OQ126611 | OQ126365 | OQ126361 |
| LC18480 = HS1.2472                | FFSC  | <i>F. verticilloides</i> | China, Henan Province, Anyang City (E114.73, N35.37)                   | HeN_19_Corn  | Temperate monsoon     | Maize | MER | 12 Oct. 2020 | S.Y. Wang           | OQ125727 | — | — | OQ125911 | OQ126607 | OQ126364 | OQ126360 |
| LC18479 = HS1.2430                | FFSC  | <i>F. verticilloides</i> | China, Henan Province, Anyang City (E114.72, N35.38)                   | HeN_4_Corn   | Temperate monsoon     | Maize | MER | 12 Oct. 2020 | S.Y. Wang           | OQ125712 | — | — | OQ125908 | OQ126604 | OQ126341 | OQ126413 |
| LC18432 = HS1.2396                | FFSC  | <i>F. verticilloides</i> | China, Henan Province, Anyang City (E114.72, N35.36)                   | HeN_3_Corn   | Temperate monsoon     | Maize | MER | 12 Oct. 2020 | S.Y. Wang           | OQ125738 | — | — | OQ125889 | OQ126604 | OQ126359 | OQ126345 |
| LC18437 = HS1.2313                | FFSC  | <i>F. verticilloides</i> | China, Henan Province, Anyang City (E114.71, N35.39)                   | HeN_12_Corn  | Temperate monsoon     | Maize | MER | 12 Oct. 2020 | S.Y. Wang           | OQ125741 | — | — | OQ125963 | OQ126636 | OQ126346 | OQ126422 |
| LC18431 = HS1.2391                | FFSC  | <i>F. verticilloides</i> | China, Henan Province, Anyang City (E114.71, N35.36)                   | HeN_6_Corn   | Temperate monsoon     | Maize | MER | 12 Oct. 2020 | S.Y. Wang           | OQ125737 | — | — | OQ125888 | OQ126621 | OQ126336 | OQ126425 |
| LC18380 = HS1.2592                | FFSC  | <i>F. verticilloides</i> | China, Henan Province, Anyang City (E114.7, N35.39)                    | HeN_13_Corn  | Temperate monsoon     | Maize | MER | 12 Oct. 2020 | S.Y. Wang           | OQ125758 | — | — | OQ125915 | OQ126606 | OQ126397 | OQ126488 |
| LC18430 = HS1.2381                | FFSC  | <i>F. verticilloides</i> | China, Henan Province, Anyang City (E114.64, N35.44)                   | HeN_8_Corn   | Temperate monsoon     | Maize | MER | 12 Oct. 2020 | S.Y. Wang           | OQ125726 | — | — | OQ125887 | OQ126670 | OQ126383 | OQ126363 |
| LC18491 = HS1.2476                | FFSC  | <i>F. verticilloides</i> | China, Henan Province, Anyang City (E114.66, N35.4)                    | HeN_17_Corn  | Temperate monsoon     | Maize | MER | 12 Oct. 2020 | S.Y. Wang           | OQ125686 | — | — | OQ125907 | OQ126685 | OQ126340 | OQ126387 |
| LC18494 = HS1.2484                | FFSC  | <i>F. verticilloides</i> | China, Henan Province, Anyang City (E114.52, N35.58)                   | HeN_16_Corn  | Temperate monsoon     | Maize | MER | 12 Oct. 2020 | S.Y. Wang           | OQ125763 | — | — | OQ125964 | OQ126623 | OQ126362 | OQ126485 |
| LC18480 = HS1.2276                | FFSC  | <i>F. verticilloides</i> | China, Heilongjiang Province, Qiqihar City (E128.39, N45.76)           | HeL_3_Corn   | Temperate monsoon     | Maize | MER | 8 Oct. 2020  | Y. Zhou             | OQ125734 | — | — | OQ125891 | OQ126608 | OQ126391 | OQ126398 |
| LC18462 = HS1.2340                | FFSC  | <i>F. verticilloides</i> | China, Heilongjiang Province, Daqing City (E124.36, N46.67)            | HeL_4_Corn   | Temperate continental | Maize | MER | 9 Oct. 2020  | S.Q. Wang           | OQ125738 | — | — | OQ125907 | OQ126603 | OQ126395 | OQ126341 |
| LC18384 = HS1.858                 | FFSC  | <i>F. verticilloides</i> | China, Hebei Province, Xingtai City (E114.84, N37.03)                  | HeB_1_Corn   | Temperate continental | Maize | MER | 9 Oct. 2020  | D.Y. Zhang          | OQ125769 | — | — | OQ125949 | OQ126630 | OQ126338 | OQ126429 |
| LC18389 = HS1.2014                | FFSC  | <i>F. verticilloides</i> | China, Hebei Province, Tangshan City (E118.06, N39.34)                 | HeB_2_Corn   | Temperate continental | Maize | MER | 7 Oct. 2020  | J.M. Liang          | OQ125760 | — | — | OQ125880 | OQ126676 | OQ126214 | OQ126385 |
| LC18416 = HS1.2143                | FFSC  | <i>F. verticilloides</i> | China, Hebei Province, Tangshan City (E117.54, N42.84)                 | HeB_3_Corn   | Temperate continental | Maize | MER | 1 Oct. 2020  | Z.G. Cao            | OQ125729 | — | — | OQ125885 | OQ126613 | OQ126372 | OQ126392 |
| LC18460 = HS1.2329                | FFSC  | <i>F. verticilloides</i> | China, Hebei Province, Shijiazhuang City (E114.5, N38.38)              | HeB_4_Corn   | Temperate continental | Maize | MER | 4 Oct. 2020  | T.Y. Liu            | OQ125733 | — | — | OQ125885 | OQ126603 | OQ126396 | OQ126365 |
| LC18562 = HS1.2307                | FFSC  | <i>F. verticilloides</i> | China, Guangxi Zhuang Autonomous Region, Hechi City (E108.71, N24.4)   | GX_6_Corn    | Subtropical monsoon   | Maize | MSR | 12 Jun. 2021 | R.J. Wei & Y.S. Fan | OQ125755 | — | — | OQ125960 | OQ126619 | OQ126347 | OQ126397 |
| LC18714 = HS1.654                 | FFSC  | <i>F. verticilloides</i> | China, Guangxi Zhuang Autonomous Region, Gaigang City (E118.6, N23.27) | GX_1_Corn    | Subtropical monsoon   | Maize | MSR | 11 Oct. 2020 | Y.X. Su             | OQ125767 | — | — | OQ125933 | OQ126646 | OQ126333 | OQ126419 |
| LC18526 = HS1.2655                | FFSC  | <i>F. verticilloides</i> | China, Guangdong Province, Meizhou City (E113.42, N24.19)              | GD_1_Corn    | Subtropical monsoon   | Maize | MSR | 21 Nov. 2020 | S.Q. Wang           | OQ125743 | — | — | OQ125958 | OQ126626 | OQ126391 | OQ126409 |
| LC18547 = HS1.2771                | FFSC  | <i>F. verticilloides</i> | China, Guangdong Province, Jiyuan City (E116.3, N24.52)                | GD_3B_Corn   | Subtropical monsoon   | Maize | MSR | 7 Jun. 2021  | Y.M. Wu             | OQ125852 | — | — | OQ125959 | OQ126636 | OQ126393 | OQ126366 |
| LC18586 = HS1.2926                | FFSC  | <i>F. verticilloides</i> | China, Guangdong Province, Meizhou City (E116.25, N24.53)              | GD_2_Corn    | Subtropical monsoon   | Maize | MSR | 26 Jun. 2021 | Z.W. Wu             | OQ125699 | — | — | OQ125920 | OQ126640 | OQ126374 | OQ126402 |
| LC18598 = HS1.2972                | FFSC  | <i>F. verticilloides</i> | China, Gansu Province, Wuyi City (E102.88, N37.82)                     | GS_3B_Corn   | Temperate continental | Maize | MSR | 26 Aug. 2021 | Y. Chen             | OQ125717 | — | — | —        | OQ126088 | OQ126327 | OQ126392 |
| LC18456 = HS1.2315                | FFSC  | <i>F. verticilloides</i> | China, Gansu Province, Wuyi City (E107.32, N35.66)                     | GS_4B_Corn   | Temperate continental | Maize | MSR | 6 Oct. 2020  | Y.F. Ma             | OQ125723 | — | — | OQ125892 | OQ126679 | OQ126384 | OQ126466 |
| LC18458 = HS1.2318                | FFSC  | <i>F. verticilloides</i> | China, Gansu Province, Baihu City (E114.85, N37.12)                    | GS_2_Corn    | Temperate continental | Maize | MER | 5 Jul. 2020  | S.Z. Zhang          | OQ125740 | — | — | OQ125893 | OQ126675 | OQ126392 | OQ126388 |
| LC18296 = HS1.1664                | FFSC  | <i>F. verticilloides</i> | China, Fujian Province, Zhangzhou City (E117.81, N24.07)               | FJ_1_Corn    | Subtropical monsoon   | Maize | MER | 13 May 2021  | W.M. Chen           | OQ125731 | — | — | OQ125956 | OQ126614 | OQ126368 | OQ126389 |
| LC18684 = HS1.2983                | FFSC  | <i>F. verticilloides</i> | China, Fujian Province, Minqing City (E116.84, N40.38)                 | FJ_2_Corn    | Subtropical monsoon   | Maize | MSR | 15 Sep. 2021 | S.L. Han            | OQ125699 | — | — | OQ125923 | OQ126624 | OQ126325 | OQ126433 |
| LC18613 = HS1.382                 | FFSC  | <i>F. verticilloides</i> | China, Beijing, Miyun District (E116.38, N40)                          | BJ_1_Corn    | Temperate monsoon     | Maize | MSR | 13 Aug. 2020 | S.L. Han            | OQ125751 | — | — | OQ125925 | OQ126672 | OQ126321 | OQ126412 |
| LC18525 = HS1.2653                | FFSC  | <i>F. verticilloides</i> | China, Anhui Province, Chaozhou City (E118.05, N32.37)                 | ANH_1_Corn   | Temperate monsoon     | Maize | MER | 26 Nov. 2020 | Y.J. Li             | OQ125739 | — | — | OQ125919 | OQ126683 | OQ126358 | OQ126387 |
| LC18480 = HS1.2229                | FIESC | <i>F. avenaceum</i>      | China, Jiangsu Province, Lianyungang City (E119.02, N34.46)            | JH_24A_Corn  | Temperate monsoon     | Maize | MSR | 19 Sep. 2020 | S.L. Han            | OQ125252 | — | — | —        | OQ125941 | OQ125188 | —        |
| LC18685 = HS1.382                 | FIESC | <i>F. avenaceum</i>      | China, Shanxi Province, Linqu County (E112.72, N29.45)                 | SHN_4A_Corn  | Temperate monsoon     | Maize | MSR | 13 Aug. 2020 | S.L. Han            | OQ125251 | — | — | —        | OQ125940 | OQ125184 | —        |
| LC18259 = HS1.1660                | FIESC | <i>F. clusii</i>         | China, Hebei Province, Xiangqing City (E112.39, N31.82)                | HE_5_Wheat   | Subtropical monsoon   | Wheat | FHB | 12 May 2021  | H.W. He             | OQ125253 | — | — | —        | OQ125919 | OQ125112 | —        |
| LC18350 = HS1.2701                | FIESC | <i>F. compunctum</i>     | China, Shandong Province, Jinan City (E117.1, N36.39)                  | SD_7_Corn    | Temperate monsoon     | Maize | MER | 29 Sep. 2020 | X.Y. Liu            | OQ125397 | — | — | —        | OQ125920 | OQ125113 | —        |
| LC18382 = HS1.199                 | FIESC | <i>F. subglaucescens</i> | China, Xinjiang Uygur Autonomous Region, Urumqi City (E88.31, N43.36)  | XJ_2_Wheat   | Temperate continental | Wheat | FHB | 1 Jul. 2020  | Q. Liu              | OQ125289 | — | — | —        | OQ125988 | OQ125146 | —        |
| CGM3.2.2636 T = LC18436 = HS1.221 | FIESC | <i>F. verticillium</i>   | China, Heilongjiang Province, Daqing City (E124.81, N46.66)            | HeL_5_Rice   | Temperate continental | Rice  | ISR | 7 Oct. 2020  | Y.J. Li             | OQ125708 | — | — | —        | OQ125959 | OQ125147 | —        |
| LC18685 = HS1.501                 | FIESC | <i>F. guilliermondii</i> | China, Guangdong Province, Qingyuan City (E112.4, N24.91)              | GD_5_Rice    | Subtropical monsoon   | Rice  | ISR | 15 Oct. 2020 | J.F. Liang          | OQ125208 | — | — | —        | OQ125912 | OQ125133 | —        |
| LC18701 = HS1.612                 | FIESC | <i>F. finasteriae</i>    | China, Guangxi Zhuang Autonomous Region, Gaigang City (E118.6, N23.27) | GX_1_Corn    | Subtropical monsoon   | Maize | MSR | 11 Oct. 2020 | Y.X. Su             | OQ125282 | — | — | —        | OQ125940 | OQ125148 | —        |
| CGM3.2.2616 T = LC1897 = HS1.587  | FIESC | <i>F. fovearum</i>       | China, Shanxi Province, Handan City (E117.63, N33.21)                  | SHN_4A_Wheat | Temperate monsoon     | Wheat | FHB | 13 May 2021  | Y.J. Chen           | OQ125281 | — | — | —        | OQ125944 | OQ125150 | —        |
| LC18376 = HS1.197                 | FIESC | <i>F. fovearum</i>       | China, Fujian Province, Longyan City (E116.85, N24.98)                 | FJ_3_Rice    | Subtropical monsoon   | Rice  | ISR | 7 Oct. 2020  | Y.J. Li             | OQ125280 | — | — | —        | OQ125943 | OQ125149 | —        |
| LC18372 = HS1.196                 | FIESC | <i>F. fovearum</i>       | China, Fujian Province, Longyan City (E116.85, N24.98)                 | FJ_3_Rice    | Subtropical monsoon   | Rice  | ISR | 7 Oct. 2020  | Y.J. Li             | OQ125279 | — | — | —        | OQ125942 | OQ125148 | —        |
| LC18763 = HS1.793                 | FIESC | <i>F. humuli</i>         | China, Jiangsu Province, Nanjing City (E118.87, N31.03)                | JH_40_Rice   | Subtropical monsoon   | Rice  | ISR | 18 Sep. 2020 | S.L. Han            | OQ125277 | — | — | —        | OQ125917 | OQ125110 | —        |
| LC18353 = HS1.2900                | FIESC | <i>F. humuli</i>         | China, Henan Province, Zhaoyuan City (E115.13, N33.23)                 | HeN_27_Wheat | Temperate monsoon     | Wheat | FCR | 3 Jun. 2021  | W.W. Fan            | OQ125278 | — | — | —        | OQ125918 | OQ125111 | —        |
| LC18719 = HS1.752                 | FIESC | <i>F. ipomoeae</i>       | China, Shandong Province, Jinan City (E117.1, N36.39)                  | SD_7_Corn    | Temperate monsoon     | Maize | MER | 29 Sep. 2020 | X.Y. Liu            | OQ125260 | — | — | —        | OQ125929 | OQ125122 | —        |
| LC18542 = HS1.101                 | FIESC | <i>F. ipomoeae</i>       | China, Liaoning Province, Shenyang City (E123.45, N41.9)               | LN_25_Wheat  | Temperate monsoon     | Wheat | FHB | 9 Jul. 2020  | Z.G. Cao            | OQ125254 | — | — | —        | OQ125923 | OQ125114 | —        |
| LC18447 = HS1.2259                | FIESC | <i>F. ipomoeae</i>       | China, Jiangsu Province, Yangzhou City (E118.79, N32.58)               | JH_33_Rice   | Temperate monsoon     | Rice  | ISR | 21 Sep. 2020 | S.L. Han            | OQ125265 | — | — | —        | OQ125933 | OQ125118 | —        |
| LC18453 = HS1.2302                | FIESC | <i>F. ipomoeae</i>       | China, Jiangsu Province, Taizhou City (E120.01, N32.5)                 | JH_11B_Corn  | Temperate monsoon     | Maize | MSR | 21 Sep. 2020 | S.L. Han            | OQ125266 | — | — | —        | OQ125934 | OQ125127 | —        |
| LC18322 = HS1.933                 | FIESC | <i>F. ipomoeae</i>       | China, Jiangsu Province, Taizhou City (E119.99, N32.37)                | JH_18A_Corn  | Temperate monsoon     | Maize | MSR | 21 Sep. 2020 | S.L. Han            | OQ125261 | — | — | —        | OQ125930 | OQ125115 | —        |
| LC18409 = HS1.2117                | FIESC | <i>F. ipomoeae</i>       | China, Jiangsu Province, Taizhou City (E119.99, N32.37)                | JH_36_Rice   | Temperate monsoon     | Rice  | ISR | 21 Sep. 2020 | S.L. Han            | OQ125260 | — | — | —        | OQ125938 | OQ125125 | —        |
| LC18422 = HS1.2161                | FIESC | <i>F. ipomoeae</i>       | China, Jiangsu Province, Nanjing City (E118.87, N31.03)                | JH_9B_Corn   | Subtropical monsoon   | Maize | MSR | 18 Sep. 2020 | S.L. Han            | OQ125264 | — | — | —        | OQ125932 | OQ125117 | —        |
| LC18339 = HS1.1819                | FIESC | <i>F. ipomoeae</i>       | China, Jiangsu Province, Lianyungang City (E118.97, N34.47)            | JH_73_Wheat  | Temperate monsoon     | Wheat | FHB | 24 May 2021  | F.J. Hu             | OQ125262 | — | — | —        | OQ125931 | OQ125116 | —        |
| LC18341 = HS1.1821                | FIESC | <i>F. ipomoeae</i>       | China, Jiangsu Province, Lianyungang City (E118.49, N34.51)            | JH_72_Wheat  | Temperate monsoon     | Wheat | FHB | 24 May 2021  | F.J. Hu             | OQ125263 | — | — | —        | OQ125935 | OQ125119 | —        |
| LC18697 = HS1.598                 | FIESC | <i>F. ipomoeae</i>       | China, Jiangsu Province, Huaiyin City (E119.11, N33.76)                | JH_19B_Corn  | Temperate monsoon     | Maize | MSR | 20 Sep. 2020 | S.L. Han            | OQ125259 | — | — | —        | OQ125928 | OQ125129 | —        |
| LC18639 = HS1.478                 | FIESC | <i>F. ipomoeae</i>       | China, Jiangsu Province, Huaiyin City (E119.82, N33.91)                | JH_55_Wheat  | Temperate monsoon     | Wheat | FHB | 20 Sep. 2020 | S.L. Han            | OQ125257 | — | — | —        | OQ125926 | OQ125120 | —        |
| LC18664 = HS1.524                 | FIESC | <i>F. ipomoeae</i>       | China, Jiangsu Province, Huaiyin City (E119.85, N33.7)                 | JH_13_Corn   | Temperate monsoon     | Maize | MSR | 20 Sep. 2020 | S.L. Han            | OQ125258 | — | — | —        | OQ125927 | OQ125121 | —        |
| LC18589 = HS1.256                 | FIESC | <i>F. ipomoeae</i>       | China, Henan Province, Yangyang City (E112.74, N29.47)                 | HeN_3A_Corn  | Subtropical monsoon   | Maize | MSR | 14 Aug. 2020 | S.L. Han            | OQ125255 | — | — | —        | OQ125924 | OQ125126 | —        |
| LC18474 = HS1.240                 | FIESC | <i>F. ipomoeae</i>       | China, Henan Province, Yangyang City (E112.72, N29.45)                 | HeN_4B_Corn  | Subtropical monsoon   | Maize | MSR | 13 Aug. 2020 | S.L. Han            | OQ125268 | — | — | —        | OQ125937 | OQ125130 | —        |
| LC18619 = HS1.406                 | FIESC | <i>F. ipomoeae</i>       | China, Henan Province, Jingzhou City (E112.98, N29.5)                  | HeN_9_Wheat  | Subtropical monsoon   | Wheat | FHB | 14 Aug. 2020 | S.L. Han            | OQ125256 | — | — | —        | OQ125925 | OQ125123 | —        |
| LC18581 = HS1.2636                | FIESC | <i>F. ipomoeae</i>       | China, Guangxi Zhuang Autonomous Region, Hechi City (E108.71, N24.4)   | GX_6_Corn    | Subtropical monsoon   | Maize | MSR | 12 Jun. 2021 | R.J. Wei & Y.S. Fan | OQ125270 | — | — | —        | OQ125939 | OQ125128 | —        |
| LC18378 = HS1.198                 | FIESC | <i>F. ipomoeae</i>       | China, Fujian Province, Longyan City (E116.85, N24.98)                 | FJ_3_Rice    | Subtropical monsoon   | Rice  | ISR | 7 Oct. 2020  | Y.J. Li             | OQ125267 | — | — | —        | OQ125936 | OQ125124 | —        |
| CGM3.2.2619 T = LC1897 = HS1.751  | FIESC | <i>F. finasteriae</i>    | China, Shandong Province, Jinan City (E117.1, N36.39)                  | SD_7_Corn    | Temperate monsoon     | Maize | MER | 29 Sep. 2020 | X.Y. Liu            | OQ125271 | — | — | —        | OQ125921 | OQ12     |          |

|                                  |       |                        |                                                                        |             |                       |       |     |              |                       |          |   |   |   |   |          |          |   |
|----------------------------------|-------|------------------------|------------------------------------------------------------------------|-------------|-----------------------|-------|-----|--------------|-----------------------|----------|---|---|---|---|----------|----------|---|
| LC18514 + HSL2584                | FIESC | <i>F. fulva</i>        | China, Jiangsu Province, Huaiyin City (E118.84, N33.82)                | J8_14_Corn  | Temperate monsoon     | Male  | MR  | 28 Sep. 2020 | S.L. Han              | OQ125326 | — | — | — | — | OQ125434 | OQ125230 | — |
| LC18745 + HSL720                 | FIESC | <i>F. fulva</i>        | China, Jiangsu Province, Huaiyin City (E118.83, N33.63)                | J8_53_Wheat | Temperate monsoon     | Wheat | FHB | 28 Sep. 2020 | S.L. Han              | OQ125308 | — | — | — | — | OQ125419 | OQ125163 | — |
| LC18642 + HSL483                 | FIESC | <i>F. fulva</i>        | China, Jiangsu Province, Huaiyin City (E118.83, N33.63)                | J8_12R_Corn | Temperate monsoon     | Male  | MR  | 28 Sep. 2020 | S.L. Han              | OQ125297 | — | — | — | — | OQ125418 | OQ125162 | — |
| LC18789 + HSL611                 | FIESC | <i>F. fulva</i>        | China, Jiangsu Province, Donglai City (E120.42, N32.63)                | J8_32_Rice  | Temperate monsoon     | Rice  | ISR | 9 Oct. 2020  | J.Y. Liang            | OQ125307 | — | — | — | — | OQ125410 | OQ125151 | — |
| LC18585 + HSL252                 | FIESC | <i>F. fulva</i>        | China, Hunan Province, Yangyang City (E112.74, N29.47)                 | HN_3R_Corn  | Subtropical monsoon   | Male  | MR  | 13 Aug. 2020 | S.L. Han              | OQ125339 | — | — | — | — | OQ125398 | OQ125180 | — |
| LC18241 + HSL1165                | FIESC | <i>F. fulva</i>        | China, Hubei Province, Yangtze City (E112.41, N31.72)                  | HB_4_Wheat  | Temperate monsoon     | Wheat | FHB | 12 May 2021  | H.W. He               | OQ125312 | — | — | — | — | OQ125422 | OQ125165 | — |
| LC18588 + HSL2359                | FIESC | <i>F. fulva</i>        | China, Hunan Province, Anyang City (E114.7, N31.39)                    | HN_13_Corn  | Temperate monsoon     | Male  | MR  | 12 Oct. 2020 | S.Y. Wang             | OQ125325 | — | — | — | — | OQ125433 | OQ125185 | — |
| LC18545 + HSL2296                | FIESC | <i>F. fulva</i>        | China, Hubei Province, Langyang City (E116.45, N30.85)                 | HB_3_Wheat  | Temperate continental | Wheat | FCR | 8 Jan. 2021  | J.B. Wang             | OQ125327 | — | — | — | — | OQ125435 | OQ125188 | — |
| CGM/C3.2428 Y + LC18179 + HSL459 | FIESC | <i>F. sinuogymnosa</i> | China, Sichuan Province, Mianyang City (E105.15, N31.78)               | SC_2_Rice   | Subtropical monsoon   | Rice  | ISR | 4 Oct. 2020  | M.L. Feng             | OQ125335 | — | — | — | — | OQ125319 | OQ125232 | — |
| LC18549 + HSL2773                | FIESC | <i>F. sinuogymnosa</i> | China, Guangdong Province, Meilishan City (E116.3, N24.52)             | GD_3R_Corn  | Subtropical monsoon   | Male  | MR  | 7 Jan. 2021  | Y.M. Wu               | OQ125336 | — | — | — | — | OQ125311 | OQ125226 | — |
| LC18380 + HSL890                 | FIESC | <i>F. monnii</i>       | China, Shandong Province, Zantaozhu City (E117, N35.85)                | SD_3_Corn   | Temperate monsoon     | Male  | MR  | 26 Sep. 2020 | Q. Lu                 | OQ125285 | — | — | — | — | OQ125493 | OQ125151 | — |
| LC18363 + HSL1928                | FIESC | <i>F. monnii</i>       | China, Shandong Province, Taitan City (E116.75, N35.74)                | SD_16_Wheat | Temperate monsoon     | Wheat | FCR | 4 Jan. 2021  | C.-Q. Liu             | OQ125287 | — | — | — | — | OQ125494 | OQ125153 | — |
| LC18361 + HSL566                 | FIESC | <i>F. monnii</i>       | China, Jiangsu Province, Liangyang City (E119.82, N34.46)              | J8_58_Wheat | Temperate monsoon     | Wheat | FHB | 19 Sep. 2020 | S.L. Han              | OQ125283 | — | — | — | — | OQ125491 | OQ125149 | — |
| LC18789 + HSL647                 | FIESC | <i>F. monnii</i>       | China, Hubei Province, Tangshan City (E118.86, N30.34)                 | HB_2_Corn   | Temperate continental | Male  | MR  | 7 Oct. 2020  | J.M. Liang            | OQ125284 | — | — | — | — | OQ125492 | OQ125150 | — |
| LC18796 + HSL2966                | FIESC | <i>F. monnii</i>       | China, Gansu Province, Wuzui City (E102.88, N37.82)                    | GS_18_Corn  | Temperate continental | Male  | MR  | 26 Aug. 2021 | Y. Chen               | OQ125286 | — | — | — | — | OQ125495 | OQ125152 | — |
| LC18441 + HSL411                 | FIESC | <i>F. perambucatum</i> | China, Jiangsu Province, Taishan City (E119.86, N32.47)                | J8_8R_Corn  | Temperate monsoon     | Male  | MR  | 21 Sep. 2020 | S.L. Han              | OQ125337 | — | — | — | — | OQ125443 | OQ125241 | — |
| LC18624 + HSL2162                | FIESC | <i>F. perambucatum</i> | China, Jiangsu Province, Nanjing City (E118.87, N31.83)                | J8_9R_Corn  | Subtropical monsoon   | Male  | MR  | 18 Sep. 2020 | S.L. Han              | OQ125351 | — | — | — | — | OQ125446 | OQ125247 | — |
| LC18355 + HSL2713                | FIESC | <i>F. perambucatum</i> | China, Hainan Province, Lingao County (E109.58, N19.7)                 | HAN_3_Corn  | Tropical monsoon      | Male  | MR  | 27 Nov. 2020 | X.Q. Liu              | OQ125359 | — | — | — | — | OQ125449 | OQ125246 | — |
| LC18780 + HSL614                 | FIESC | <i>F. perambucatum</i> | China, Guangxi Zhuang Autonomous Region, Gaigang City (E118.6, N23.27) | GX_1_Corn   | Subtropical monsoon   | Male  | MR  | 11 Oct. 2020 | Y.X. Su               | OQ125349 | — | — | — | — | OQ125444 | OQ125243 | — |
| LC18380 + HSL1987                | FIESC | <i>F. perambucatum</i> | China, Guangdong Province, Meilishan City (E116.3, N24.52)             | GD_3A_Corn  | Subtropical monsoon   | Male  | MR  | 7 Jan. 2021  | Y.M. Wu               | OQ125358 | — | — | — | — | OQ125448 | OQ125244 | — |
| LC18585 + HSL2924                | FIESC | <i>F. perambucatum</i> | China, Guangdong Province, Meilishan City (E116.25, N24.53)            | GD_2_Corn   | Subtropical monsoon   | Male  | MR  | 26 Jan. 2021 | Z.W. Wu               | OQ125340 | — | — | — | — | OQ125447 | OQ125242 | — |
| LC18295 + HSL1663                | FIESC | <i>F. perambucatum</i> | China, Fujian Province, Zhangzhou City (E117.81, N24.07)               | FJ_1_Corn   | Subtropical monsoon   | Male  | MR  | 13 May 2021  | W.M. Chen             | OQ125338 | — | — | — | — | OQ125445 | OQ125245 | — |
| LC18396 + HSL294                 | FIESC | <i>F. indicae</i>      | China, Zhejiang Province, Ningbo City (E121.8, N29.9)                  | ZJ_1_Rice   | Subtropical monsoon   | Rice  | ISR | 7 Oct. 2020  | J.L. Li               | OQ125342 | — | — | — | — | OQ125449 | OQ125213 | — |
| LC18267 + HSL1381                | FIESC | <i>F. indicae</i>      | China, Zhejiang Province, Jiaxing City (E120.48, N30.51)               | ZJ_7_Wheat  | Subtropical monsoon   | Wheat | FHB | 12 May 2021  | J.G. Zhou & G.W. Wang | OQ125377 | — | — | — | — | OQ125476 | OQ125207 | — |
| LC18420 + HSL2155                | FIESC | <i>F. indicae</i>      | China, Shandong Province, Taitan City (E117.1, N35.87)                 | SD_4R_Corn  | Temperate monsoon     | Male  | MR  | 1 Oct. 2020  | L.Y. E                | OQ125378 | — | — | — | — | OQ125479 | OQ125217 | — |
| LC18608 + HSL3940                | FIESC | <i>F. indicae</i>      | China, Jiangsu Province, Jiangsu City (E115.71, N29.77)                | J8_2_Corn   | Subtropical monsoon   | Male  | MR  | 5 Oct. 2021  | J.E. Huang            | OQ125348 | — | — | — | — | OQ125487 | OQ125212 | — |
| LC18674 + HSL545                 | FIESC | <i>F. indicae</i>      | China, Jiangsu Province, Yangzhou City (E118.79, N32.58)               | J8_7A_Corn  | Temperate monsoon     | Male  | MR  | 21 Sep. 2020 | S.L. Han              | OQ125365 | — | — | — | — | OQ125484 | OQ125203 | — |
| LC18792 + HSL870                 | FIESC | <i>F. indicae</i>      | China, Jiangsu Province, Taishan City (E119.89, N32.37)                | J8_10R_Corn | Temperate monsoon     | Male  | MR  | 21 Sep. 2020 | S.L. Han              | OQ125374 | — | — | — | — | OQ125473 | OQ125208 | — |
| LC18454 + HSL2387                | FIESC | <i>F. indicae</i>      | China, Jiangsu Province, Taishan City (E119.89, N32.37)                | J8_36_Rice  | Temperate monsoon     | Rice  | ISR | 21 Sep. 2020 | S.L. Han              | OQ125381 | — | — | — | — | OQ125482 | OQ125212 | — |
| LC18780 + HSL872                 | FIESC | <i>F. indicae</i>      | China, Jiangsu Province, Taishan City (E119.86, N32.47)                | J8_8R_Corn  | Temperate monsoon     | Male  | MR  | 21 Sep. 2020 | S.L. Han              | OQ125375 | — | — | — | — | OQ125474 | OQ125214 | — |
| LC18682 + HSL579                 | FIESC | <i>F. indicae</i>      | China, Jiangsu Province, Nanjing City (E118.87, N31.83)                | J8_9A_Corn  | Subtropical monsoon   | Male  | MR  | 18 Sep. 2020 | S.L. Han              | OQ125366 | — | — | — | — | OQ125485 | OQ125204 | — |
| LC18426 + HSL2169                | FIESC | <i>F. indicae</i>      | China, Jiangsu Province, Liangyang City (E119.89, N34.5)               | J8_24R_Corn | Temperate monsoon     | Male  | MR  | 19 Sep. 2020 | S.L. Han              | OQ125379 | — | — | — | — | OQ125480 | OQ125209 | — |
| LC18685 + HSL576                 | FIESC | <i>F. indicae</i>      | China, Jiangsu Province, Liangyang City (E119.83, N34.46)              | J8_3R_Rice  | Temperate monsoon     | Rice  | ISR | 19 Sep. 2020 | S.L. Han              | OQ125367 | — | — | — | — | OQ125466 | OQ125228 | — |
| LC18691 + HSL587                 | FIESC | <i>F. indicae</i>      | China, Jiangsu Province, Liangyang City (E118.95, N34.5)               | J8_29_Rice  | Temperate monsoon     | Rice  | ISR | 19 Sep. 2020 | S.L. Han              | OQ125368 | — | — | — | — | OQ125468 | OQ125204 | — |
| LC18480 + HSL2048                | FIESC | <i>F. indicae</i>      | China, Jiangsu Province, Liangyang City (E118.95, N34.48)              | J8_45_Rice  | Temperate monsoon     | Rice  | ISR | 13 Aug. 2020 | S.L. Han              | OQ125346 | — | — | — | — | OQ125478 | OQ125216 | — |
| LC18688 + HSL581                 | FIESC | <i>F. indicae</i>      | China, Jiangsu Province, Liangyang City (E118.93, N34.49)              | J8_1R_Corn  | Temperate monsoon     | Male  | MR  | 19 Sep. 2020 | S.L. Han              | OQ125344 | — | — | — | — | OQ125467 | OQ125216 | — |
| LC18692 + HSL591                 | FIESC | <i>F. indicae</i>      | China, Jiangsu Province, Liangyang City (E118.9, N34.5)                | J8_27A_Corn | Temperate monsoon     | Male  | MR  | 19 Sep. 2020 | S.L. Han              | OQ125360 | — | — | — | — | OQ125469 | OQ125199 | — |
| LC18630 + HSL455                 | FIESC | <i>F. indicae</i>      | China, Jiangsu Province, Liangyang City (E118.84, N34.5)               | J8_22R_Corn | Temperate monsoon     | Male  | MR  | 19 Sep. 2020 | S.L. Han              | OQ125359 | — | — | — | — | OQ125467 | OQ125197 | — |
| LC18629 + HSL453                 | FIESC | <i>F. indicae</i>      | China, Jiangsu Province, Huaiyin City (E119.15, N33.64)                | J8_23R_Corn | Temperate monsoon     | Male  | MR  | 28 Sep. 2020 | S.L. Han              | OQ125358 | — | — | — | — | OQ125456 | OQ125196 | — |
| LC18634 + HSL467                 | FIESC | <i>F. indicae</i>      | China, Jiangsu Province, Huaiyin City (E119.11, N33.74)                | J8_19A_Corn | Temperate monsoon     | Male  | MR  | 28 Sep. 2020 | S.L. Han              | OQ125361 | — | — | — | — | OQ125459 | OQ125215 | — |
| LC18631 + HSL458                 | FIESC | <i>F. indicae</i>      | China, Jiangsu Province, Huaiyin City (E119.11, N33.66)                | J8_21_Corn  | Temperate monsoon     | Male  | MR  | 28 Sep. 2020 | S.L. Han              | OQ125360 | — | — | — | — | OQ125458 | OQ125198 | — |
| LC18648 + HSL495                 | FIESC | <i>F. indicae</i>      | China, Jiangsu Province, Huaiyin City (E119.1, N33.69)                 | J8_44_Rice  | Temperate monsoon     | Rice  | ISR | 28 Sep. 2020 | S.L. Han              | OQ125364 | — | — | — | — | OQ125463 | OQ125202 | — |
| LC18638 + HSL476                 | FIESC | <i>F. indicae</i>      | China, Jiangsu Province, Huaiyin City (E119.07, N33.85)                | J8_17_Corn  | Temperate monsoon     | Male  | MR  | 28 Sep. 2020 | S.L. Han              | OQ125362 | — | — | — | — | OQ125460 | OQ125199 | — |
| LC18640 + HSL481                 | FIESC | <i>F. indicae</i>      | China, Jiangsu Province, Huaiyin City (E119.02, N33.91)                | J8_16R_Corn | Temperate monsoon     | Male  | MR  | 28 Sep. 2020 | S.L. Han              | OQ125343 | — | — | — | — | OQ125461 | OQ125200 | — |
| LC18609 + HSL685                 | FIESC | <i>F. indicae</i>      | China, Jiangsu Province, Huaiyin City (E118.95, N33.7)                 | J8_13_Corn  | Temperate monsoon     | Male  | MR  | 28 Sep. 2020 | S.L. Han              | OQ125370 | — | — | — | — | OQ125456 | OQ125205 | — |
| LC18742 + HSL718                 | FIESC | <i>F. indicae</i>      | China, Jiangsu Province, Huaiyin City (E118.84, N33.82)                | J8_54_Wheat | Temperate monsoon     | Wheat | FHB | 28 Sep. 2020 | S.L. Han              | OQ125372 | — | — | — | — | OQ125471 | OQ125206 | — |
| LC18641 + HSL482                 | FIESC | <i>F. indicae</i>      | China, Jiangsu Province, Huaiyin City (E118.83, N33.63)                | J8_12R_Corn | Temperate monsoon     | Male  | MR  | 28 Sep. 2020 | S.L. Han              | OQ125363 | — | — | — | — | OQ125462 | OQ125201 | — |
| LC18442 + HSL2243                | FIESC | <i>F. indicae</i>      | China, Jiangsu Province, Huaiyin City (E118.83, N33.63)                | J8_39_Rice  | Temperate monsoon     | Rice  | ISR | 28 Sep. 2020 | S.L. Han              | OQ125380 | — | — | — | — | OQ125481 | OQ125217 | — |
| LC18612 + HSL234                 | FIESC | <i>F. indicae</i>      | China, Hunan Province, Zhangjiazui City (E118.47, N29.89)              | HN_1_Corn   | Subtropical monsoon   | Male  | MR  | 13 Aug. 2020 | S.L. Han              | OQ125354 | — | — | — | — | OQ125452 | OQ125214 | — |
| LC18614 + HSL383                 | FIESC | <i>F. indicae</i>      | China, Hunan Province, Yangyang City (E112.84, N29.5)                  | HN_7_Rice   | Subtropical monsoon   | Rice  | ISR | 14 Aug. 2020 | S.L. Han              | OQ125355 | — | — | — | — | OQ125453 | OQ125218 | — |
| LC18618 + HSL482                 | FIESC | <i>F. indicae</i>      | China, Hunan Province, Yangyang City (E112.74, N29.47)                 | HN_3R_Corn  | Subtropical monsoon   | Male  | MR  | 14 Aug. 2020 | S.L. Han              | OQ125356 | — | — | — | — | OQ125454 | OQ125219 | — |
| LC18513 + HSL258                 | FIESC | <i>F. indicae</i>      | China, Hunan Province, Yangyang City (E112.86, N29.5)                  | HN_2_Corn   | Subtropical monsoon   | Male  | MR  | 14 Aug. 2020 | S.L. Han              | OQ125353 | — | — | — | — | OQ125451 | OQ125193 | — |
| LC18510 + HSL257                 | FIESC | <i>F. indicae</i>      | China, Hunan Province, Jingzhou City (E112.86, N29.5)                  | HN_9_Wheat  | Subtropical monsoon   | Wheat | FHB | 14 Aug. 2020 | S.L. Han              | OQ125352 | — | — | — | — | OQ125450 | OQ125192 | — |
| LC18620 + HSL412                 | FIESC | <i>F. indicae</i>      | China, Hubei Province, Yangyang City (E112.14, N32.84)                 | HB_1_Rice   | Subtropical monsoon   | Rice  | ISR | 2 Sep. 2020  | H. Zhao               | OQ125357 | — | — | — | — | OQ125455 | OQ125221 | — |
| LC18595 + HSL2963                | FIESC | <i>F. indicae</i>      | China, Hunan Province, Yangyang City (E115.35, N31.62)                 | HN_3R_Rice  | Subtropical monsoon   | Rice  | ISR | 26 Aug. 2021 | Y. Chen               | OQ125384 | — | — | — | — | OQ125486 | OQ125210 | — |
| LC18539 + HSL2740                | FIESC | <i>F. indicae</i>      | China, Hainan Province, Sanya City (E109.75, N18.39)                   | HAN_1A_Corn | Tropical monsoon      | Male  | MR  | 6 Feb. 2021  | J.L. Li               | OQ125347 | — | — | — | — | OQ125483 | OQ125209 | — |
| LC18567 + HSL2842                | FIESC | <i>F. indicae</i>      | China, Guangxi Zhuang Autonomous Region, Hechi City (E108.47, N24.58)  | GX_4_Corn   | Subtropical monsoon   | Male  | MR  | 12 Jan. 2021 | R.J. Wei & Y.S. Fan   | OQ125382 | — | — | — | — | OQ125484 | OQ125215 | — |
| LC18616 + HSL924                 | FIESC | <i>F. indicae</i>      | China, Guangxi Zhuang Autonomous Region, Gaigang City (E118.6, N23.3)  | GX_7_Rice   | Subtropical monsoon   | Rice  | ISR | 11 Oct. 2020 | Y.X. Su               | OQ125376 | — | — | — | — | OQ125475 | OQ125215 | — |
| LC18716 + HSL659                 | FIESC | <i>F. indicae</i>      | China, Guangdong Province, Qingyuan City (E112.29, N24.74)             | GD_4_Rice   | Subtropical monsoon   | Rice  | ISR | 17 Oct. 2020 | J.F. Ling             | OQ125371 | — | — | — | — | OQ125470 | OQ125213 | — |
| LC18576 + HSL2803.101            | FIESC | <i>F. indicae</i>      | China, Guangdong Province, Meilishan City (E116.3, N24.52)             | GD_3R_Corn  | Subtropical monsoon   | Male  | MR  | 7 Jan. 2021  | Y.M. Wu               | OQ125341 | — | — | — | — | OQ125448 | OQ125191 | — |
| LC18584 + HSL2921                | FIESC | <i>F. indicae</i>      | China, Guangdong Province, Meilishan City (E116.25, N24.53)            | GD_2_Corn   | Subtropical monsoon   | Male  | MR  | 26 Jan. 2021 | Z.W. Wu               | OQ125383 | — | — | — | — | OQ125485 | OQ125211 | — |
| LC18294 + HSL1662                | FIESC | <i>F. indicae</i>      | China, Fujian Province, Zhangzhou City (E117.81, N24.07)               | FJ_1_Corn   | Subtropical monsoon   | Male  | MR  | 13 May 2021  | W.M. Chen             | OQ125345 | — | — | — | — | OQ125477 | OQ125208 | — |
| LC18787 + HSL884                 | FIESC | <i>F. indicae</i>      | China, Fujian Province, Fuzhou City (E119.24, N26.88)                  | FJ_2_Rice   | Subtropical monsoon   | Rice  | ISR | 6 Oct. 2020  | J.Y. Su               | OQ125373 | — | — | — | — | OQ125472 | OQ125210 | — |
| LC18754 + HSL874                 | FIESC | <i>F. indicae</i>      | China, Jiangsu Province, Yangzhou City (E118.75, N32.63)               | J8_49_Wheat | Temperate monsoon     | Wheat | FHB | 21 Sep. 2020 | S.L. Han              | OQ125389 | — | — | — | — | OQ125498 | OQ125246 | — |
| LC18684                          |       |                        |                                                                        |             |                       |       |     |              |                       |          |   |   |   |   |          |          |   |









[illegible]

[illegible]





[illegible]

[illegible]

[illegible]

[illegible]

[illegible]



[illegible]

|            |      |                     |                                                       |             |                   |       |     |             |          |   |   |   |   |   |   |          |   |
|------------|------|---------------------|-------------------------------------------------------|-------------|-------------------|-------|-----|-------------|----------|---|---|---|---|---|---|----------|---|
| HSL2830_D8 | FTSC | <i>F. avenaceum</i> | China, Gansu Province, Longnan City (E105.86, N33.75) | GS_8_Wheat  | Temperate monsoon | Wheat | FHB | 8 Jan. 2021 | C. Zhang | — | — | — | — | — | — | OQ178159 | — |
| HSL2854    | FTSC | <i>F. avenaceum</i> | China, Gansu Province, Longnan City (E105.86, N33.75) | GS_8_Wheat  | Temperate monsoon | Wheat | FHB | 8 Jan. 2021 | C. Zhang | — | — | — | — | — | — | OQ178158 | — |
| HSL2855    | FTSC | <i>F. avenaceum</i> | China, Gansu Province, Longnan City (E105.86, N33.75) | GS_8_Wheat  | Temperate monsoon | Wheat | FHB | 8 Jan. 2021 | C. Zhang | — | — | — | — | — | — | OQ178157 | — |
| HSL2835    | FTSC | <i>F. avenaceum</i> | China, Gansu Province, Longnan City (E105.95, N33.75) | GS_7_Wheat  | Temperate monsoon | Wheat | FHB | 8 Jan. 2021 | C. Zhang | — | — | — | — | — | — | OQ178156 | — |
| HSL2818    | FTSC | <i>F. avenaceum</i> | China, Gansu Province, Longnan City (E105.92, N33.75) | GS_13_Wheat | Temperate monsoon | Wheat | FHB | 8 Jan. 2021 | C. Zhang | — | — | — | — | — | — | OQ178183 | — |
| HSL2819    | FTSC | <i>F. avenaceum</i> | China, Gansu Province, Longnan City (E105.92, N33.75) | GS_13_Wheat | Temperate monsoon | Wheat | FHB | 8 Jan. 2021 | C. Zhang | — | — | — | — | — | — | OQ178186 | — |
| HSL2822    | FTSC | <i>F. avenaceum</i> | China, Gansu Province, Longnan City (E105.92, N33.75) | GS_13_Wheat | Temperate monsoon | Wheat | FHB | 8 Jan. 2021 | C. Zhang | — | — | — | — | — | — | OQ178175 | — |
| HSL2823    | FTSC | <i>F. avenaceum</i> | China, Gansu Province, Longnan City (E105.92, N33.75) | GS_13_Wheat | Temperate monsoon | Wheat | FHB | 8 Jan. 2021 | C. Zhang | — | — | — | — | — | — | OQ178187 | — |
| HSL2834    | FTSC | <i>F. avenaceum</i> | China, Gansu Province, Longnan City (E105.92, N33.75) | GS_13_Wheat | Temperate monsoon | Wheat | FHB | 8 Jan. 2021 | C. Zhang | — | — | — | — | — | — | OQ178174 | — |
| HSL2868    | FTSC | <i>F. avenaceum</i> | China, Gansu Province, Longnan City (E105.83, N33.24) | GS_12_Wheat | Temperate monsoon | Wheat | FHB | 8 Jan. 2021 | C. Zhang | — | — | — | — | — | — | OQ178179 | — |
| HSL2810    | FTSC | <i>F. avenaceum</i> | China, Gansu Province, Longnan City (E105.79, N33.24) | GS_11_Wheat | Temperate monsoon | Wheat | FHB | 8 Jan. 2021 | C. Zhang | — | — | — | — | — | — | OQ178163 | — |
| HSL2814    | FTSC | <i>F. avenaceum</i> | China, Gansu Province, Longnan City (E105.79, N33.24) | GS_11_Wheat | Temperate monsoon | Wheat | FHB | 8 Jan. 2021 | C. Zhang | — | — | — | — | — | — | OQ178169 | — |
| HSL2851    | FTSC | <i>F. avenaceum</i> | China, Gansu Province, Longnan City (E105.79, N33.24) | GS_11_Wheat | Temperate monsoon | Wheat | FHB | 8 Jan. 2021 | C. Zhang | — | — | — | — | — | — | OQ178168 | — |
| HSL2852    | FTSC | <i>F. avenaceum</i> | China, Gansu Province, Longnan City (E105.79, N33.24) | GS_11_Wheat | Temperate monsoon | Wheat | FHB | 8 Jan. 2021 | C. Zhang | — | — | — | — | — | — | OQ178167 | — |
| HSL2880    | FTSC | <i>F. avenaceum</i> | China, Gansu Province, Longnan City (E105.79, N33.24) | GS_11_Wheat | Temperate monsoon | Wheat | FHB | 8 Jan. 2021 | C. Zhang | — | — | — | — | — | — | OQ178161 | — |
| HSL2899    | FTSC | <i>F. avenaceum</i> | China, Gansu Province, Longnan City (E105.79, N33.24) | GS_11_Wheat | Temperate monsoon | Wheat | FHB | 8 Jan. 2021 | C. Zhang | — | — | — | — | — | — | OQ178160 | — |

<sup>1</sup> T = ex-type;

<sup>2</sup> FburSC = *F. burgessii* species complex. FCSC = *F. chlamydosporum* species complex. FCOSC = *F. concolor* species complex. FFSC = *F. fujikuroi* species complex, previously GFSC. FHSC = *F. heterosporum* species complex. FIESC = *F. incarnatum-equiseti* species complex. FLSC = *F. lateritium* species complex. FnewSC = *F. newnesense* species complex. FNSC = *F. nisikadoi* species complex. FOsc = *F. oxysporum* species complex. FRSC = *F. redolens* species complex. FSAMSC = *F. sambucinum* species complex. FTSC = *F. tricinum* species complex.

<sup>3</sup> *F.* = *Fusarium*;

<sup>4</sup> Maize = *Zea mays*. Rice = *Oryza* sp. Wheat = *Triticum* sp.

<sup>5</sup> MSR = maize stalk rot. MER = maize ear rot. RBD = Rice bakanae disease. RSR = Rice spikelet rot. FHB = Fusarium head blight of wheat. FCR = Fusarium crown rot of wheat.

<sup>6</sup> *CaM* = Calmodulin; *H3* = Histone; ITS = Internal transcribed spacer region of the nrDNA; *rpb1* = RNA polymerase largest subunit; *rpb2* = RNA polymerase second largest subunit; *tef1* = translation elongation factor 1-alpha; *tub2* = Beta-tubulin.
