# Supplementary material for: Fusarium diversity associated with diseased cereals in China, with an updated phylogenomic assessment of the genus
Source: PubMed Central journal article supplement — Stud Mycol. 2023 Feb 22;104:87–148. doi: 10.3114/sim.2022.104.02 (PMC10282163; doi:10.3114/sim.2022.104.02), 2023-02-22
Supplement: sim-2023-104-2-SD7.pdf [file sim-2023-104-2-SD7.pdf]

**Table S7.** Acknowledgement of participants.

|            |            |            |           |           |           |            |           |
|------------|------------|------------|-----------|-----------|-----------|------------|-----------|
| A.F. Liang | D. Zeng    | H.J. Zan   | J.Y. Su   | L.Yu      | Q. Han    | S.X. Wang  | W.W. Duan |
| A.Y. Jiao  | D.X. Wang  | H.K. Wang  | J.Z. Feng | L.Z. Zhao | Q. Liu    | S.Y. Wang  | W.W. Fan  |
| B.B. Peng  | D.Y. Zhang | H.W. He    | K. Guo    | M. Hu     | Q.J. Lu   | S.Z. Zhang | W.Z. Li   |
| B.C. Ma    | F.J. Hu    | H.Y. Yu    | K. Zhang  | M. Li     | Q.Y. Yu   | T. Qiu     | X. Li     |
| B.H. Shi   | G. Li      | J. Liang   | L. Ma     | M.L. Feng | R.J. Wei  | T.T. Zhang | X. Zhou   |
| C. Ding    | G.J. Han   | J.B. Wang  | L. Meng   | M.Y. Wang | R.X. Yang | T.Y. Liu   | X.B. Wang |
| C. Ju      | G.S. Yan   | J.E. Huang | L. Wang   | N.N. Ding | S. Yang   | W. Zhao    | X.H. Xu   |
| C. Zhong   | G.W. Wang  | J.F. Ling  | L. Zhao   | P. Shen   | S.B. Chen | W.H. Li    | X.Q. Liu  |
| C.Q. Liu   | H. Zhao    | J.G. Tian  | L. Zhu    | P. Yang   | S.M. Pan  | W.J. Dong  | X.X. Han  |
| C.X. Yu    | H.B. Zhang | J.G. Zhou  | L.L. Liu  | P.W. Liu  | S.Q. Wang | W.M. Chen  | X.Y. Che  |
| D. Li      | H.C. Tang  | J.Y. Liang | L.Y. Ji   | P.Yang    | S.T. Ye   | W.R.Z. Sun | X.Y. Chen |

|            |            |            |
|------------|------------|------------|
| X.Y. Liang | Y.H. Li    | Y.Y. Li    |
| X.Y. Liu   | Y.H. Wei   | Z. Ma      |
| X.Y. Ma    | Y.J. Chen  | Z.B. Zhang |
| Y. Chen    | Y.L. Guo   | Z.G. Gao   |
| Y. Li      | Y.M. Han   | Z.H. Qi    |
| Y. Liang   | Y.M. Wu    | Z.J. Cao   |
| Y. Zhang   | Y.S. Pan   | Z.L. Li    |
| Y. Zhou    | Y.W. Mu    | Z.Q. Liu   |
| Y.D. Guo   | Y.W. Zhang | Z.W. Wu    |
| Y.F. Mu    | Y.X. Huang | Z.X. Zhang |
| Y.F. Zhang | Y.X. Su    | Z.Y. Sun   |

---
